# Supplementary material for: Elevated 1 h postload plasma glucose levels identify adults with normal glucose tolerance but increased risk of non-alcoholic fatty liver disease
Source: PubMed Central journal article supplement — BMJ Open Diabetes Res Care. 2014 Aug 8;2(1):e000016. doi: 10.1136/bmjdrc-2014-000016 (PMC4212569; doi:10.1136/bmjdrc-2014-000016), 2014-08-08
Supplement: bmjdrc-2014-000016-s1.pdf [file bmjdrc-2014-000016-s1.pdf]

**Supplementary Table 1 – Age and gender adjusted univariate correlations between liver enzymes and anthropometric and metabolic variables**

|                                    | <b>ALT</b> | <b>P</b> | <b>AST</b> | <b>P</b> | <b>GGT</b> | <b>P</b> |
|------------------------------------|------------|----------|------------|----------|------------|----------|
|                                    | <i>r</i>   | <i>P</i> |            |          |            |          |
| BMI ( $kg/m^2$ )                   | 0.24       | <0.0001  | 0.18       | <0.0001  | 0.09       | 0.02     |
| Waist ( <i>cm</i> )                | 0.22       | <0.0001  | 0.13       | 0.001    | 0.07       | 0.05     |
| Fat mass (%)                       | 0.23       | <0.0001  | 0.15       | 0.008    | 0.12       | 0.002    |
| Fasting glucose ( <i>mg/dl</i> )   | 0.15       | <0.0001  | 0.12       | 0.001    | 0.07       | 0.06     |
| 1-h glucose ( <i>mg/dl</i> )       | 0.18       | <0.0001  | 0.14       | 0.001    | 0.10       | 0.01     |
| 2-h glucose ( <i>mg/dl</i> )       | 0.21       | <0.0001  | 0.16       | <0.0001  | 0.16       | <0.0001  |
| Fasting insulin ( $\mu U/ml$ )     | 0.23       | <0.0001  | 0.23       | <0.0001  | 0.09       | 0.02     |
| 1-h insulin ( $\mu U/ml$ )         | 0.18       | <0.0001  | 0.13       | 0.001    | 0.06       | 0.12     |
| 2-h insulin ( $\mu U/ml$ )         | 0.26       | <0.0001  | 0.24       | <0.0001  | 0.14       | 0.001    |
| Total cholesterol ( <i>mg/dl</i> ) | 0.11       | 0.004    | 0.04       | 0.24     | 0.14       | <0.0001  |
| HDL ( <i>mg/dl</i> )               | -0.14      | <0.0001  | -0.12      | 0.001    | -0.01      | 0.72     |
| Triglycerides ( <i>mg/dl</i> )     | 0.19       | <0.0001  | 0.13       | <0.0001  | 0.20       | <0.0001  |
| IGF-1 ( <i>ng/ml</i> )             | -0.16      | <0.0001  | -0.12      | 0.004    | -0.11      | 0.01     |
| hsCRP ( <i>mg/l</i> )              | 0.11       | 0.008    | 0.09       | 0.03     | 0.09       | 0.04     |
| Liver IR index                     | 0.33       | <0.0001  | 0.24       | <0.0001  | 0.14       | 0.001    |

BMI=Body Mass Index; ALT= Alanine aminotransferase; AST=aspartate aminotransferase;

GGT=gamma-glutamyltransferase
